# Supplementary material
Source: Springer Nature journal article supplement (https://www.springermedizin.de/resource/supplementary/12911_2009_310_MOESM1_ESM.pdf/9525610)
Supplement: MOESM1 [file 9525610]

# Selected Medical Service?

yes

MEL-No.

**204**

MEL-Groups

**427**

LDF

no

ICD-10 Code

**219**

HDG-Groups

**552**

LDF

**Step 1**

**Step 2**

**Step 3**
